# Supplementary material for: Elastic resistance training has positive influence on the functional capacity and appetite hormone in overweight men
Source: Research Square preprint supplement (doi:10.21203/rs.3.rs-2472562/v1), 2023-01-17
Supplement: Supplementary file 1 [file f0e21eaba78596b192a8bebd.docx]

**Table 1**. Characteristics subjects before any intervention

|  | ERT | Control |
| --- | --- | --- |
| Age (yr) | 26.8±3.2 | 27.1±2.5 |
| Weight (kg) | 84.2±6.5 | 85.3±5.6 |
| High (cm) | 179.4±6.1 | 23.9±3.1 |
| BF% | 24.9±1.1 | 23.1±4.3 |
| BMI (kg/m2) | 26.4±2.3 | 26.1±2.3 |

BMI: body mass index; BF: body fat percentage

**Table 2.** Macronutrient and caloric expenditure before and after elastic exercise training program in the ERT and Control.

|  | Time | ERT | Control | p |
| --- | --- | --- | --- | --- |
| Proteins (g) | Pre test | 113.5±20.51 | 110.8±17.2 | 0.16 |
|  | posttest | 116±15.2 | 118±17.2 | 0.70 |
| Carbohydrates | pretest | 409.7±55.05 | 420.1±23.8 | 0.07 |
|  | posttest | 412.19±22.1 | 398.5±21.1 | 0.08 |
| Fat (g) | Pretest | 114.1±13.3 | 119.1±21.2 | 0.27 |
|  | posttest | 122.2±9.4 | 115.7±7.2 | 0.87 |
| Kcal/d | pretest | 3119.7±125.5 | 3195±80 | 0.15 |
|  | posttest | 3212.2±95.5 | 3107.3±88.5 | 0.09 |

P: p value for independent t -test

**Table 3.** Variables change after elastic exercise training program in the ERT and Control.

|  |  | ERT | Control | *p* |
| --- | --- | --- | --- | --- |
| Ghrelin (pg/mL) | pre | 305.2±31.9 | 311.1±26.2 | 0.045 |
| - | post | 375.9±64.9 | 319.4±17.55 | - |
| Obestatin (pg/mL) | pre | 205±23 | 209±18.3 | 0.412 |
| - | post | 224±31.4 | 216±22.7 | - |
| BF% | pre | 26.4±2.3 | 26.1±2.3 | 0.04 |
|  | post | 24.1±4 | 25.7±3 | - |
| Push up (no) | pre | 14±2.9 | 15±3.1 | 0.004 |
| - | post | 22±3 | 16±2.7 | - |
| Squat (no) | pre | 32±3 | 31±1.8 | 0.011 |
|  | post | 37±1.4 | 33±1.4 |  |

p: p-value for time× group. ERT: resistance training with elastic bands
